# Supplementary material for: A large role of missing volatile organic compounds reactivity from anthropogenic emissions in ozone pollution regulation
Source: Copernicus journal article supplement (doi:10.5194/egusphere-2023-2647), 2023-12-15
Supplement: Supplementary file 1 [file egusphere-2023-2647-supplement.pdf]

**Supplementary Information for “A large role of missing  
volatile organic compounds reactivity from anthropogenic  
emissions in ozone pollution regulation”**

Wenjie Wang<sup>1,2\*</sup>, Bin Yuan<sup>1\*</sup>, Hang Su<sup>2</sup>, Yafang Cheng<sup>2</sup>, Jipeng Qi<sup>1</sup>, Sihang Wang<sup>1</sup>,  
Wei Song<sup>3</sup>, Xinming Wang<sup>3</sup>, Chaoyang Xue<sup>2</sup>, Chaoqun Ma<sup>2</sup>, Fengxia Bao<sup>2</sup>, Hongli  
Wang<sup>4</sup>, Shengrong Lou<sup>4</sup>, Min Shao<sup>1</sup>

<sup>1</sup> Institute for Environmental and Climate Research, Jinan University,  
Guangzhou 511443, China

<sup>2</sup> Multiphase Chemistry Department, Max Planck Institute for Chemistry, Mainz  
55128, Germany

<sup>3</sup> State Key Laboratory of Organic Geochemistry, Guangzhou Institute of  
Geochemistry, Chinese Academy of Sciences, Guangzhou 510640, China

<sup>4</sup> State Environmental Protection Key Laboratory of Formation and Prevention of  
Urban Air Pollution Complex, Shanghai Academy of Environmental Sciences,  
Shanghai 200233, China

*\*Correspondence to:* Bin Yuan ([byuan@jnu.edu.cn](mailto:byuan@jnu.edu.cn));  
Wenjie Wang ([Wenjie.Wang@mpic.de](mailto:Wenjie.Wang@mpic.de))

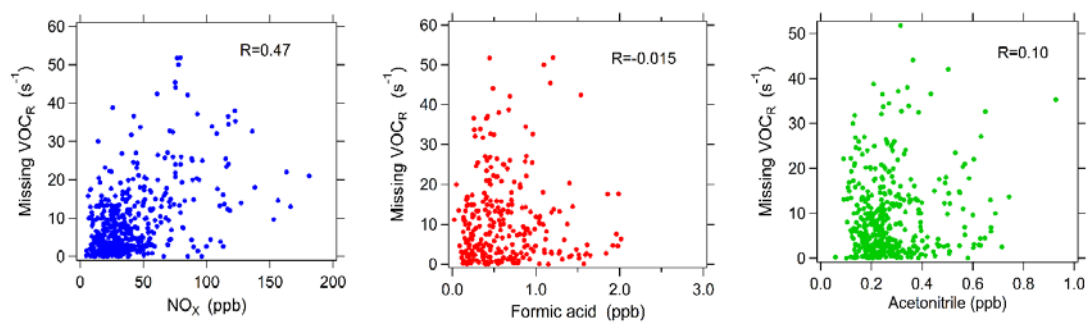

Figure S1. Correlation of missing VOC<sub>R</sub> with NO<sub>X</sub>, formic acid (HCOOH) and acetonitrile during the measurement in Guangzhou. Each point represents hourly data.

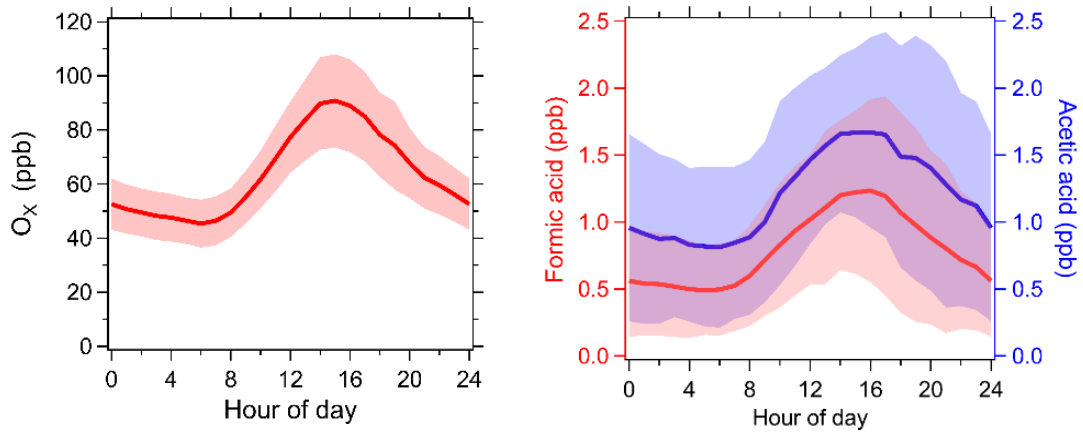

Figure S2. Diurnal variations in Ox, formic acid and acetic acid.
